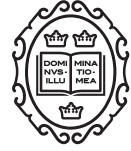

Original article

# Body mass index and risk of autoimmune diseases: a study within the Danish National Birth Cohort

Maria C Harpsøe,<sup>1\*</sup> Saima Basit,<sup>1</sup> Mikael Andersson,<sup>1</sup> Nete M Nielsen,<sup>1</sup> Morten Frisch,<sup>1</sup> Jan Wohlfahrt,<sup>1</sup> Ellen A Nohr,<sup>2</sup> Allan Linneberg<sup>3</sup> and Tine Jess<sup>1</sup>

<sup>1</sup>Department of Epidemiology Research, Statens Serum Institut, Copenhagen, Denmark, <sup>2</sup>Section for Epidemiology, Department of Public Health, Aarhus University, Aarhus, and Department of Obstetrics and Gynaecology, Odense University Hospital, Odense, Denmark and <sup>3</sup>Research Centre for Prevention and Health, Glostrup University Hospital, Glostrup, Denmark

\*Corresponding author. Department of Epidemiology Research, Statens Serum Institut, Artillerivej 5, 2300 Copenhagen S, Denmark. E-mail: rrrh@ssi.dk

Accepted 6 February 2014

## Abstract

**Background:** A possible aetiological link between obesity and certain autoimmune diseases (ADs) has been suggested. We investigated the associations between body mass index (BMI, kg/m<sup>2</sup>) and 43 ADs.

**Methods:** 75 008 women participating in the Danish National Birth Cohort were followed during a median time of 11 years. Diagnoses on ADs were retrieved from the Danish National Patient Register. Cox proportional hazard ratios (HRs) with 95% confidence intervals (CIs) were calculated adjusting for potential confounders (smoking, alcohol, parity and socio-occupational status).

**Results:** During follow-up, 2430 women (3.2%) developed a total of 2607 new-onset ADs. Risk of any autoimmune disease was increased in obese women (HR, 1.27; 95% CI, 1.11 to 1.46) compared with normal weight women (18.5–≤25 kg/m<sup>2</sup>). Obese women (BMI ≥30 kg/m<sup>2</sup>) were at increased risk of sarcoidosis (HR 3.59; 95% CI, 2.31 to 5.57) and type 1 diabetes mellitus (HR 2.67; 95% CI, 1.71 to 4.17). Risk of dermatitis herpetiformis increased by 14% (95% CI, 1% to 30%) per BMI unit. Conversely, risk of celiac disease and Raynaud's phenomenon decreased by 7% (95% CI, 1% to 13%) and 12% (95% CI, 4% to 19%) per BMI unit, respectively. Further associations between BMI and risk of psoriasis, rheumatoid arthritis and Crohn's disease were suggested.

**Conclusions:** BMI was found to be associated with several ADs. This was most pronounced between obesity and risk of sarcoidosis and and risk of type 1 diabetes mellitus. These novel findings need confirmation and the possible role of adipose tissue-derived immunological changes in the development of autoimmune reactions needs consideration.

**Key words:** Body mass index, obesity, inflammation, leptin, autoimmune disease

### Key Messages

- In this large population-based cohort study of 75 008 younger Danish women, we examined the association between BMI and 43 autoimmune diseases (ADs). BMI was found to be associated with some, but not all ADs.
- Most pronouncedly, obesity (BMI  $\geq 30$ ) was associated with increased risk of sarcoidosis ( $>3$ -fold) and type 1 diabetes mellitus ( $>2$ -fold).
- A higher risk of psoriasis and rheumatoid arthritis was observed in obese women, and the association between BMI and Crohn's disease showed a U-shaped pattern [obese and underweight women (BMI  $< 18.5$ ) being at increased risk].
- Inverse associations between BMI and celiac disease and Raynaud's phenomenon were observed.
- BMI did not seem to influence risk of multiple sclerosis or thyroid autoimmunity.

## Introduction

Obesity constitutes a serious health problem as reflected by the increased all-cause mortality among obese individuals.<sup>1</sup> Similarly, autoimmune diseases are among the leading causes of death among females in the UK<sup>2</sup> and the USA.<sup>3</sup> During the past decades since 1980, a growing prevalence of obesity has been observed worldwide,<sup>4–6</sup> though perhaps reaching a plateau in the past years with more than one-third of adults being obese in the USA.<sup>7</sup>

Today, obesity is considered a low-grade systemic inflammatory condition with elevated levels of inflammatory markers such as leptin, C-reactive protein, tumour necrosis factor- $\alpha$  and interleukin-6.<sup>8</sup> The pro-inflammatory adipokine, leptin, which is secreted excessively in obesity by adipocytes, has been identified as a potent immune modulator possibly playing an important role in the development of autoimmune diseases (ADs).<sup>9–11</sup> The pro-inflammatory effect of leptin seems to sustain autoreactive cell proliferation, thereby increasing the risk of AD.<sup>10,12</sup>

An association between obesity and various ADs has been suggested but prospective cohort studies on the subject are sparse. High BMI (body mass index, kg/m<sup>2</sup>) has been suggested to relate to development and progression of rheumatoid arthritis (RA),<sup>12–14</sup> but results are inconsistent.<sup>15</sup> Likewise, BMI may associate with thyroid autoimmunity<sup>16</sup> and psoriasis<sup>17,18</sup> but results are contradicting and many studies are based on BMI in patients with existing AD, hence containing risk of reverse causality. Children diagnosed with type 1 diabetes mellitus (T1DM) are increasingly overweight or obese<sup>19,20</sup> but whether obesity among adults is associated with T1DM is still unknown. The only prospective study of the impact of BMI on risk of inflammatory bowel disease (IBD) showed no associations<sup>21</sup> as opposed to a previous retrospective study

linking high BMI to Crohn's disease (CD).<sup>22</sup> Further, obesity or obesity-related immunological changes have been suggested in a limited number of studies to associate with other ADs, such as multiple sclerosis (MS),<sup>23,24</sup> celiac disease<sup>25,26</sup> and systemic lupus erythematosus (SLE).<sup>27</sup>

The aim of this large-scale cohort study was to assess the relationship between pre-pregnancy BMI in Danish women of reproductive age and development of 43 different autoimmune diseases in the following decade, also considering the potential effect of weight changes in pregnancy and postpartum weight retention.

## Methods

### Ethical considerations

The study was purely register- and questionnaire-based without contact with participants and followed the regulations and instructions set up by the Danish Data Protection Agency (approval no. 2008-54-0472).

### Study population

The study was based on just above 92 000 women originally enrolled in the Danish National Birth Cohort (DNBC) during 1996–2002. Recruitment by general practitioners took place in early pregnancy throughout Denmark. Women were asked to participate in telephone interviews during pregnancy and early motherhood.<sup>28</sup> In the present study, we used information from the first (16 weeks of gestation), second (30 weeks of gestation), and third (6 months after delivery) interview. A few women gave birth to more than one child in the period 1996–2002, but in the present study only information on BMI related to the first

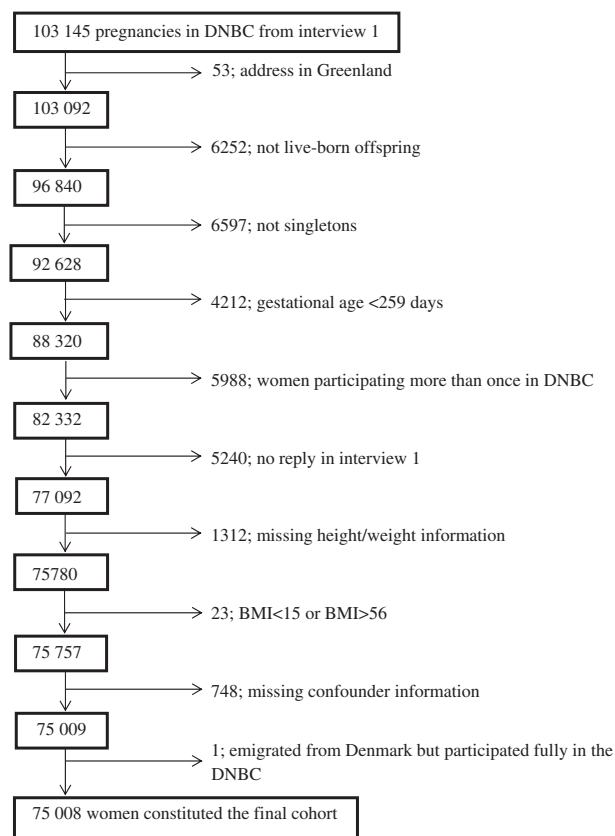

**Figure 1.** Flow chart describing the cohort consisting of women from the Danish National Birth Cohort.

pregnancy registered in the DNBC was used as an exposure variable. Less than 1% ( $n=748$ ) of the cohort members were without complete information on confounders such as smoking and parity, and these women were excluded from the cohort. The final cohort consisted of 75 008 women; flow chart information can be viewed in Figure 1.

## Exposure

The exposure variable pre-pregnancy body mass index ( $\text{kg}/\text{m}^2$ ) was calculated from self-reported information on height ('How tall are you?') and pre-pregnancy weight ('What was your weight before the pregnancy?') in the first interview. Categories were based on the World Health Organization's BMI definitions where  $<18.5 \text{ kg}/\text{m}^2$  is considered underweight,  $18.5\text{--}<25 \text{ kg}/\text{m}^2$  normal weight (reference),  $25\text{--}<30 \text{ kg}/\text{m}^2$  overweight and  $\geq 30 \text{ kg}/\text{m}^2$  obese.<sup>29</sup> Pre-pregnancy weight was used as an estimate of the woman's general weight in adult life prior to the pregnancy.

## Outcomes

Study outcomes included first hospital contact (primary diagnoses on in- and outpatients, not including emergency room contacts) for the 43 most common autoimmune

diseases obtained from the Danish National Patient Register (Table 1), using codes from the International Classification of Diseases, 8th (ICD-8) and 10th revision (ICD-10). ICD-8 codes were used to exclude prevalent AD patients before start of follow-up. The Danish National Patient Register has covered all inpatient hospital contacts since 1977 and all outpatient contacts since 1995. The 43 chosen autoimmune diseases are represented in a list from Harrison's Principles of Internal Medicine.<sup>30,31</sup> To be noted, women who were diagnosed with inflammatory bowel disease (IBD), but shifted diagnosis from Crohn's disease to ulcerative colitis or vice versa in the follow-up period, were given the latest recorded diagnosis but date of diagnosis was determined by the first IBD diagnosis.

## Confounders

Confounders chosen a priori included: parity at pregnancy [0 children (reference), 1 child,  $\geq 2$  children]; ever smoking (during and/or after pregnancy reported in interview 1, 2, or 3; no smoking at any time as reference; smoking before pregnancy was not included in interviews); alcohol consumption per week [prior to pregnancy; 0 units (reference), 1–7 units,  $\geq 8$  units] and socio-occupational status at pregnancy based on the woman's current or most recent occupation within the past 6 months, or if in school, on type of education. Status 1, implied long duration of education or leaders in large companies (reference); status 2, middle-long education or leaders in small companies; status 3, short education, vocational or less; status 4, unskilled, other work or receiving unemployment benefits; status 5, on state welfare. Age was accounted for by using it as underlying timescale in all analyses.

## Statistical analysis

Women were followed from time of delivery until development of AD (first hospital contact), emigration, death or end of follow-up on 31 December 2011. By starting follow-up after delivery, ADs directly related to pregnancy were avoided to some extent. Hazard ratios (HRs) with 95% confidence intervals (CIs) of first hospitalization for an autoimmune disease were calculated using Cox proportional hazards models with the woman's age as underlying timescale. The proportional hazards assumption was evaluated in two ways for the 'any AD' fully adjusted model. The effect of BMI at age  $\leq 40$  years was compared with the effect of BMI at age  $>40$  years using an interaction test. Furthermore, the empirical score process<sup>32</sup> was used to evaluate the proportional hazards assumption in the complete age range. None of the tests showed any violation of the assumption. Women with any AD before start of

**Table 1.** Autoimmune diseases with corresponding ICD-8 and ICD-10 codes

| Autoimmune disease            | ICD-8 codes                    | ICD-10 codes        |
|-------------------------------|--------------------------------|---------------------|
| Addison's disease             | 255.10, 255.11                 | E27.1, E27.2        |
| Ankylosing spondylitis        | 712.49                         | M45, M08.1          |
| Behcet's disease              | 136.02                         | M35.2               |
| Buerger's syndrome            | 443.19                         | M31.1B, D17.31      |
| Celiac disease                | 269.00                         | K90.0               |
| Crohn's disease               | 563.0                          | K50                 |
| Dermatitis herpetiformis      | 693.09                         | L13.0               |
| Diabetes mellitus type 1      | 249                            | E10                 |
| Dupuytren's disease           | 733.90                         | M72.0               |
| Erythema nodosum              | 695.29                         | L52                 |
| Goodpasture's syndrome        | 446.19                         | M31.0               |
| Graves' disease               | 242.0                          | E05.0               |
| Guillain-Barré syndrome       | 354.00                         | G61.0               |
| Haemolytic anaemia            | 283.90–283.92                  | D59.0, D59.1        |
| Hashimoto's thyroiditis       | 245.03                         | E06.3               |
| Henoch-Schönlein purpura      | 287.09                         | D69.0               |
| ITP <sup>a</sup>              | 287.10                         | D69.3               |
| Kawasaki syndrome             | 446.92                         | M30.3               |
| Localized lupus erythematosus | 695.49                         | L93                 |
| Localized scleroderma         | 701.01, 701.08, 701.09         | L94.0, L94.1, L94.3 |
| Myasthenia gravis             | 733.09                         | G70.0               |
| Multiple sclerosis            | 340                            | G35                 |
| Pemphigoid                    | 694.05                         | L12                 |
| Pernicious anaemia            | 281.0                          | D51.0               |
| Pemphigus foliaceus           | 694.02                         | L10.2               |
| Pemphigus vulgaris            | 694.00                         | L10.0               |
| Polyarteritis nodosa          | 446.09                         | M30.0               |
| Polymyositis/dermatomyositis  | 716                            | M33                 |
| Primary biliary cirrhosis     | 571.90                         | K74.3               |
| Psoriasis                     | 696.09–696.19                  | L40                 |
| Rheumatic fever               | 390, 391                       | I00, I01            |
| Rheumatoid arthritis          | 712.19, 712.99, 712.39, 712.59 | M05, M06            |
| Raynaud's phenomenon          | 443.00–443.09                  | D173.0              |
| Reiter's disease              | 136.01                         | M02.3               |
| Sarcoidosis                   | 135                            | D86                 |
| Sjögren's syndrome            | 734.90                         | M35.0               |
| Sympathetic ophthalmia        | 366.02                         | H44.1B              |
| Systemic lupus erythematosus  | 734.19                         | M32                 |
| Systemic scleroderma          | 734.0                          | M34                 |
| Temporal arteritis            | 446.30, 446.31, 446.39         | M31.5, M31.6, M35.3 |
| Ulcerative colitis            | 563.19, 569.04                 | K51                 |
| Vitiligo                      | 709.01                         | L80                 |
| Wegener's granulomatosis      | 446.29                         | M31.3               |

<sup>a</sup>Idiopathic thrombocytopenic purpura.

follow-up (self-reported in the DNBC or register-based diagnosis) were excluded from the analyses of 'any AD', but not in the examination of each specific disease where women were allowed to have other ADs before start of follow-up and to contribute with more than one type of AD. Before enrolment, 5.3% ( $n=4005$ ) of the women were registered as having at least one AD. Linear trend analyses using BMI as a continuous variable were

performed for ADs with  $\geq 5$  cases and HRs per BMI unit were only estimated for diseases compatible with a linear trend. ADs with  $\geq 50$  cases in the cohort were categorized according to BMI (underweight, normal-weight, overweight, obese). HRs were estimated using normal weight as reference. All statistical tests were performed by Wald tests using SAS software version 9.3 (SAS Institute, Cary, NC, USA).

In sensitivity analyses for the 13 most prevalent ADs, referred to in the following as restricted diagnosis analysis, we restricted AD outcomes to include only women recorded at least twice with the same AD diagnosis in the Danish National Patient Register using the date of AD diagnosis on the date of the second diagnosis. This served to increase the validity and specificity of recorded diagnoses. To evaluate gestational weight gain (GWG; as a surrogate for sudden weight gain, in kg, continuous variable) and postpartum weight retention (PPWR; as a surrogate for persistent weight gain,  $\leq 3$ , 3–8,  $\geq 8$  kg) at 6 months after delivery as potential mediators, separate adjustments for these variables were performed for ADs either showing compatibility with a linear trend with BMI or statistically different estimates across BMI categories. In testing whether the possible mediator effect was affected by women excluded due to missing information about GWG and PPWR, the same analyses were performed for the corresponding cohorts without the adjustment for the two potential mediators (Appendix Table 4, available as Supplementary data at *IJE* online).

## Results

Overall, 75 008 women with a median age of 30.2 years (lower-upper quartile, 27.4–33.3 years) at start of follow-up were followed for a median of 11.4 years (lower-upper

quartile; 10.2–12.5 years). The cohort consisted of women from all strata according to data on smoking, alcohol and socio-occupational status information, and 27.4% were overweight or obese (Table 2).

During follow-up, 3.2% ( $n=2430$ ) of the women developed at least one AD and 2607 new AD cases were recorded. The three most frequent ADs were Graves' disease (occurring in 0.8% of cohort members), ulcerative colitis (0.5%) and rheumatoid arthritis (0.4%). Co-occurrence of ADs was present in 303 women (0.4%); of these 270 had two, 31 had three and 2 women had five co-occurring ADs. In the relationship between BMI and later development of autoimmune disease, compatibility with a linear trend was found for all ADs except ankylosing spondylitis, ulcerative colitis and sarcoidosis. An increased risk of 14% (95% CI 1% to 30%) per BMI unit was found for dermatitis herpetiformis but was based on too few cases to be included in further analyses (Figure 2). Below, results of mediator analyses are only mentioned when relevant, but all results can be viewed in the Appendix (available as Supplementary data at *IJE* online).

### Any autoimmune disease

Any autoimmune disease ( $n=2430$ ) occurred at a median of 5.7 (2.8–8.6) years after start of follow-up. The risk of any autoimmune disease was increased in obese women (HR, 1.27; 95% CI, 1.11 to 1.46) compared with

**Table 2.** Cohort characteristics at start of follow up ( $n=75\ 008$ )

|                                                     |                  |
|-----------------------------------------------------|------------------|
| Woman's age, median years (lower-upper quartiles)   | 30.2 (27.4–33.3) |
| Parity prior to pregnancy (%)                       |                  |
| 0 children                                          | 37 173 (49.6)    |
| 1 child                                             | 26 045 (34.7)    |
| 2+ children                                         | 11 790 (15.7)    |
| Alcohol consumption per week prior to pregnancy (%) |                  |
| 0 units                                             | 9443 (12.6)      |
| 1–7 units                                           | 57 967 (77.3)    |
| 8+ units                                            | 7598 (10.1)      |
| Smoking during or after pregnancy (%)               |                  |
| Smoking reported in interview 1, 2 or 3             | 20 709 (27.6)    |
| No smoking reported in interview 1, 2, or 3         | 54 299 (72.4)    |
| Socio-occupational status in pregnancy (%)          |                  |
| Long education / leaders in large companies         | 15 661 (20.9)    |
| Middle-long education / leaders in small companies  | 23 901 (31.9)    |
| Short education / vocational / less                 | 28 372 (37.8)    |
| Unskilled / other work / unemployment benefits      | 5467 (7.3)       |
| On state welfare                                    | 1607 (2.1)       |
| Body mass index prior to pregnancy (%)              |                  |
| $<18.5$ kg/m <sup>2</sup>                           | 3319 (4.4)       |
| $18.5$ – $<25$ kg/m <sup>2</sup>                    | 51 148 (68.2)    |
| $25$ – $<30$ kg/m <sup>2</sup>                      | 14 470 (19.3)    |
| $\geq 30$ kg/m <sup>2</sup>                         | 6071 (8.1)       |

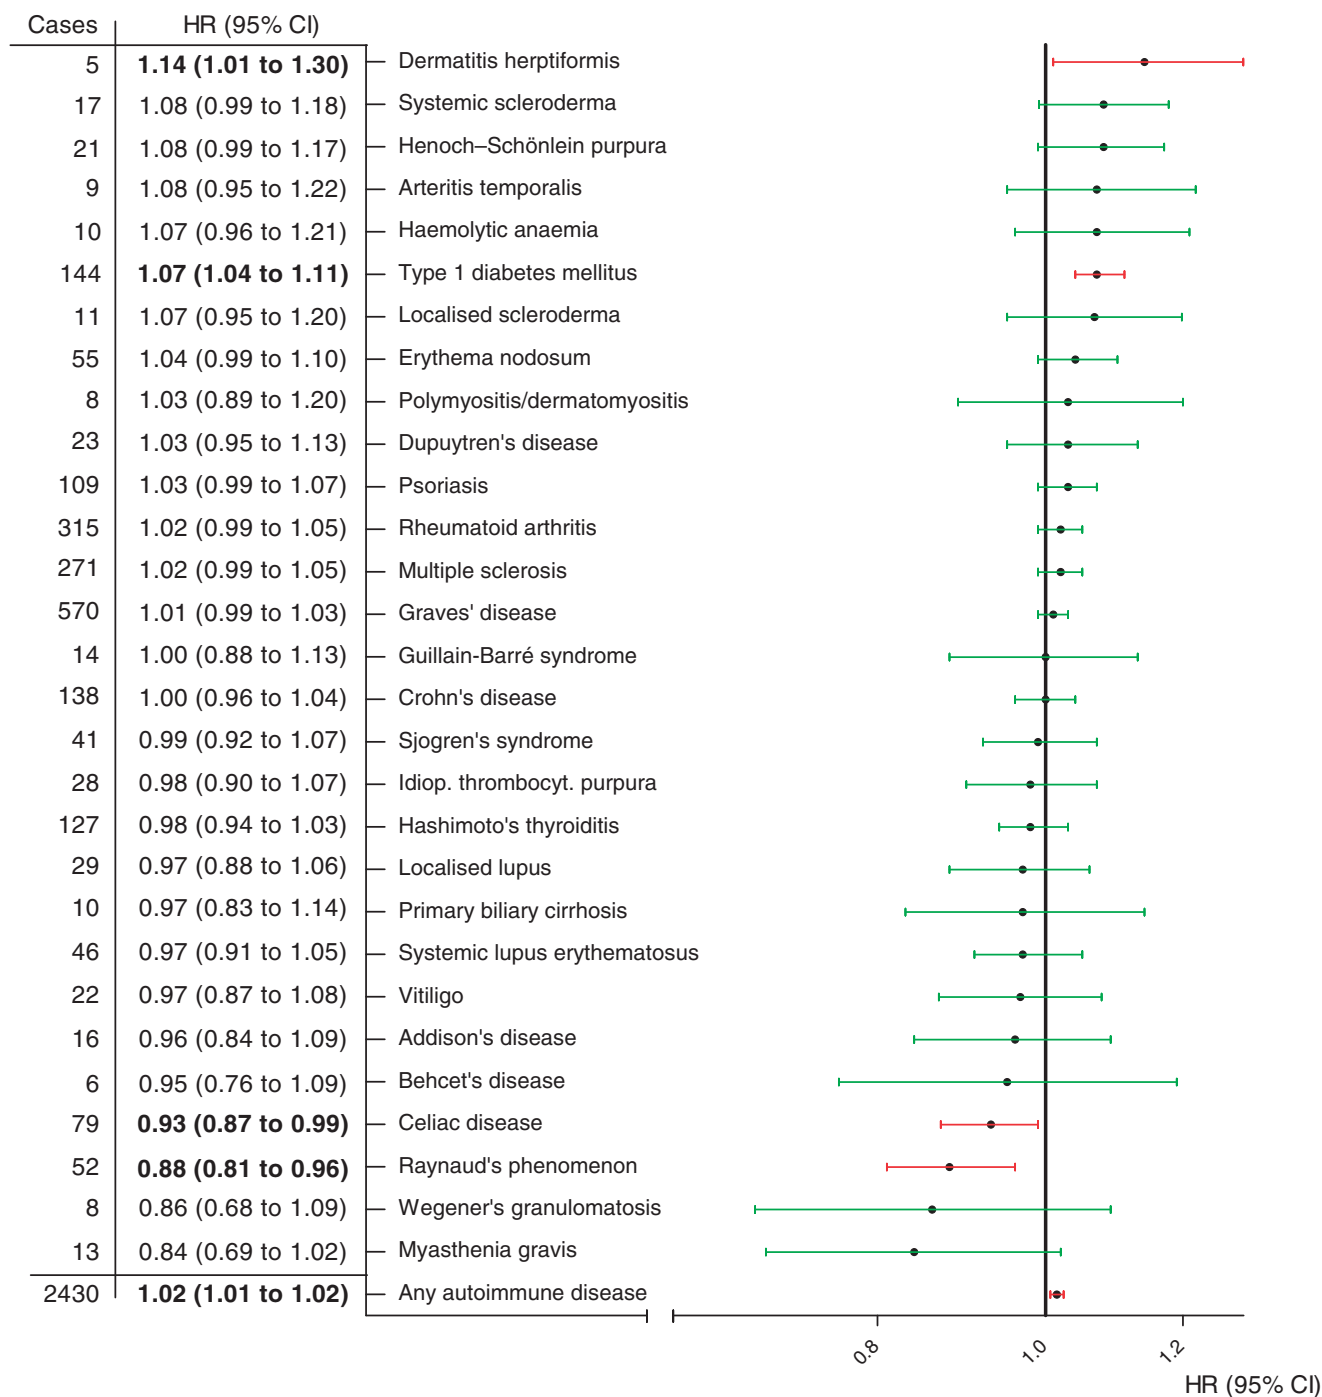

**Figure 2.** Hazard ratios (HRs) for autoimmune diseases per unit increase in body mass index in women ( $n=75008$ ). Emboldened HRs do not include 1.0. Diseases with  $\geq 20$  cases are adjusted for smoking, alcohol, parity, socio-occupational status. Diseases with  $\leq 5$  cases are not shown (Buerger's disease 1 case; Goodpasture's syndrome, 1; Kawasaki syndrome, 1; pernicious anaemia, 0; polyarteritis nodosa, 3; pemphigoid, 0; pemphigus foliaceus, 0; pemphigus vulgaris, 0; Reiter's disease, 1; rheumatic fever, 4; sympathetic ophthalmia, 0). Hazard ratios are only shown for diseases where the association between body mass index and the disease were compatible with a trend (not compatible with a trend: ankylosing spondylitis, ulcerative colitis and sarcoidosis).

normal-weight women (Table 3). Overall, a trend of linearity was observed for any autoimmune disease across BMI units ( $P_{\text{trend}} < 0.01$ ) with an increasing risk of 2% (95% CI, 1% to 2%) per BMI unit (Figure 2).

#### Celiac disease

Celiac disease showed a decreased risk of 7% (1–13%) per BMI unit increase (Figure 2). Accordingly, the risk of celiac disease was increased in underweight women



**Table 3.** Hazard ratios (HRs) of autoimmune diseases appearing with  $\geq 50$  cases in the study cohort according to body mass index (BMI; kg/m<sup>2</sup>) firstly including all women diagnosed at least once and, secondly, only including women with  $\geq 2$  diagnoses counted from second diagnosis of autoimmune diseases in the Danish National Patient Register

|                                 | N    | BMI < 18.5        | 18.5 ≤ BMI < 25 | 25 ≤ BMI < 30    | BMI ≥ 30         | <i>P</i> <sub>trend</sub> | <i>P</i> <sub>homogeneity</sub> <sup>a</sup> |
|---------------------------------|------|-------------------|-----------------|------------------|------------------|---------------------------|----------------------------------------------|
| Ankylosing spondylitis          | 68   | 0.36 (0.05–2.60)  | 1 (ref)         | 1.55 (0.91–2.65) | 0.73 (0.26–2.05) | –                         | 0.20                                         |
| ≥2 diagnoses                    | 35   | –                 | 1 (ref)         | 1.99 (0.97–4.10) | 1.18 (0.36–4.00) | –                         | 0.31                                         |
| Celiac disease                  | 79   | 2.59 (1.27–5.26)  | 1 (ref)         | 0.65 (0.33–1.28) | 0.75 (0.30–1.89) | 0.03                      | –                                            |
| ≥2 diagnoses                    | 44   | 2.23 (0.79–6.33)  | 1 (ref)         | 0.70 (0.29–1.67) | 0.55 (0.13–2.32) | 0.07                      | –                                            |
| Crohn's disease                 | 138  | 1.99 (1.08–3.66)  | 1 (ref)         | 1.10 (0.71–1.70) | 1.52 (0.89–2.62) | 0.89                      | –                                            |
| ≥2 diagnoses                    | 96   | 2.57 (1.30–5.06)  | 1 (ref)         | 1.11 (0.65–1.90) | 1.88 (1.02–3.47) | 0.89                      | –                                            |
| Erythema nodosum                | 55   | 0.42 (0.06–3.05)  | 1 (ref)         | 0.99 (0.49–1.99) | 1.68 (0.74–3.82) | 0.13                      | –                                            |
| ≥2 diagnoses                    | 24   | 1.05 (0.14–8.05)  | 1 (ref)         | 1.55 (0.59–4.07) | 1.89 (0.53–6.73) | 0.08                      | –                                            |
| Graves' disease                 | 570  | 0.75 (0.48–1.17)  | 1 (ref)         | 0.92 (0.74–1.15) | 1.23 (0.93–1.62) | 0.16                      | –                                            |
| ≥2 diagnoses                    | 315  | 0.89 (0.51–1.55)  | 1 (ref)         | 0.90 (0.67–1.21) | 1.13 (0.77–1.67) | 0.72                      | –                                            |
| Hashimoto's thyroiditis         | 127  | 1.75 (0.88–3.50)  | 1 (ref)         | 1.08 (0.69–1.70) | 1.06 (0.55–2.06) | 0.40                      | –                                            |
| ≥2 diagnoses                    | 39   | 2.23 (0.78–6.38)  | 1 (ref)         | 0.76 (0.31–1.85) | 0.31 (0.04–2.30) | 0.08                      | –                                            |
| Multiple sclerosis              | 271  | 1.31 (0.78–2.19)  | 1 (ref)         | 1.28 (0.96–1.72) | 1.00 (0.63–1.58) | 0.21                      | –                                            |
| ≥2 diagnoses                    | 201  | 1.43 (0.79–2.60)  | 1 (ref)         | 1.32 (0.94–1.85) | 1.15 (0.69–1.92) | 0.28                      | –                                            |
| Psoriasis <sup>b</sup>          | 109  | 0.91 (0.33–2.51)  | 1 (ref)         | 1.38 (0.87–2.20) | 2.16 (1.25–3.72) | 0.14                      | –                                            |
| ≥2 diagnoses                    | 30   | –                 | 1 (ref)         | 1.16 (0.46–2.95) | 3.03 (1.24–7.42) | 0.02                      | –                                            |
| Raynaud's phenomenon            | 52   | 1.01 (0.31–3.27)  | 1 (ref)         | 0.23 (0.07–0.73) | 0.50 (0.15–1.62) | <0.01                     | –                                            |
| ≥2 diagnoses <sup>c</sup>       | 12   | 1.35 (0.17–10.53) | 1 (ref)         | –                | –                | <0.01                     | –                                            |
| Rheumatoid arthritis            | 315  | 0.82 (0.45–1.50)  | 1 (ref)         | 1.12 (0.85–1.49) | 1.53 (1.07–2.18) | 0.08                      | –                                            |
| ≥2 diagnoses                    | 176  | 1.05 (0.51–2.14)  | 1 (ref)         | 1.00 (0.68–1.48) | 1.09 (0.63–1.88) | 0.72                      | –                                            |
| Sarcoidosis                     | 140  | 1.06 (0.43–2.65)  | 1 (ref)         | 1.90 (1.27–2.84) | 3.59 (2.31–5.57) | –                         | <0.01                                        |
| ≥2 diagnoses                    | 84   | 1.16 (0.36–3.78)  | 1 (ref)         | 2.26 (1.35–3.79) | 4.30 (2.47–7.50) | –                         | <0.01                                        |
| Type 1 diabetes mellitus        | 144  | 0.83 (0.34–2.06)  | 1 (ref)         | 1.42 (0.95–2.14) | 2.67 (1.71–4.17) | <0.01                     | –                                            |
| ≥2 diagnoses                    | 108  | 1.10 (0.44–2.75)  | 1 (ref)         | 1.32 (0.83–2.13) | 2.01 (1.15–3.51) | <0.01                     | –                                            |
| Ulcerative colitis <sup>d</sup> | 394  | 1.10 (0.70–1.74)  | 1 (ref)         | 0.99 (0.77–1.28) | 0.92 (0.63–1.34) | –                         | 0.94                                         |
| ≥2 diagnoses                    | 280  | 1.20 (0.71–2.04)  | 1 (ref)         | 0.93 (0.68–1.27) | 0.77 (0.48–1.25) | –                         | 0.60                                         |
| Any autoimmune disease          | 2430 | 1.08 (0.89–1.30)  | 1 (ref)         | 1.09 (0.98–1.20) | 1.27 (1.11–1.46) | <0.01                     | –                                            |
| ≥2 diagnoses                    | 1439 | 1.24 (0.98–1.56)  | 1 (ref)         | 1.05 (0.92–1.21) | 1.23 (1.02–1.47) | 0.11                      | –                                            |

All HRs are adjusted for smoking, alcohol, parity, socio-occupational status.

<sup>a</sup>Test of homogeneity was used when associations were not compatible with a linear trend.

<sup>b</sup>In a subanalysis dividing BMI into five categories instead of four, women with  $30 < \text{BMI} \leq 35$  ( $n = 16$ ) had an increased risk of psoriasis (HR 2.78; 95% CI, 1.59 to 4.85) and BMI  $> 35$  ( $n = 1$ ) had a decreased risk of psoriasis (HR 0.47; 95% CI, 0.06 to 3.37).

<sup>c</sup>Not adjusted for socio-occupational status due to few cases.

<sup>d</sup>Ulcerative colitis did not show compatibility with a linear trend which was visualized through adding an extra BMI category ( $30 \leq \text{BMI} < 35$ ; HR 0.67; 95% CI, 0.41 to 1.12 and BMI  $\geq 35$ ; HR 1.57; 95% CI, 0.92 to 2.70).

( $P_{\text{trend}} = 0.03$ ) (HR 2.59; 95% CI, 1.27 to 5.26) (Table 3). In the restricted diagnosis analysis, no association between underweight and development of celiac disease was seen ( $P_{\text{trend}} = 0.07$ ), however underweight women tended to have a 2-fold increased risk of celiac disease (HR 2.23; 95% CI, 0.79 to 6.33) although statistically insignificant (Table 3).

#### Crohn's disease

Overall, no association was observed between BMI and Crohn's disease (HR 1.00; 95% CI, 0.96 to 1.04,

$P_{\text{trend}} = 0.89$ ) (Figure 2). However, performing restricted diagnosis analysis resulted in an increased risk in both underweight (HR 2.57; 95% CI, 1.30 to 5.06) and obese women (HR 1.88; 95% CI, 1.02 to 3.47) compared with normal-weight women, pointing to a U-shaped association (Table 3).

#### Psoriasis

No linear associations between BMI and psoriasis were observed (HR 1.03; 95% CI, 0.99 to 1.07,  $P_{\text{trend}} = 0.14$ )

(Figure 2), but when comparing BMI categories, an increased risk of psoriasis was seen in obese women (HR 2.16; 95% CI, 1.25 to 3.72) compared with normal-weight women (Table 3). Further, trend of linearity in restricted diagnosis analysis (Table 3) was found ( $P_{\text{trend}} = 0.02$ ) with a more than 3-fold risk of psoriasis in obese women (HR 3.03; 95% CI, 1.24 to 7.42).

### Rheumatoid arthritis

Rheumatoid arthritis showed no overall linear association with BMI (HR 1.02; 95% CI, 0.99 to 1.05,  $P_{\text{trend}} = 0.08$ ) (Figure 2) but an increased risk of rheumatoid arthritis was observed in obese women (HR 1.53; 95% CI, 1.07 to 2.18) compared with normal-weight women (Table 3). The increased risk in obese women did, however, not persist in restricted diagnosis analysis (HR 1.09; 95% CI, 0.63 to 1.88) (Table 3).

### Raynaud's phenomenon

An inverse association between BMI and Raynaud's phenomenon was observed with a decreasing risk of 12% (4–19%) per BMI unit increase ( $P_{\text{trend}} < 0.01$ ) (Figure 2). Underweight women were at no increased risk of Raynaud's phenomenon, whereas overweight women appeared to be at a reduced risk (HR 0.23; 95% CI, 0.07 to 0.73) compared with normal-weight women (Table 3). The inverse association with overweight persisted when adjusting for GWG (HR 0.19; 95% CI, 0.05 to 0.80) and PPWR (HR 0.21; 95% CI, 0.05 to 0.86) (Appendix Table 4, available as Supplementary data at *IJE* online). There were too few cases to estimate HRs in the restricted diagnosis analysis for overweight and obese women.

### Sarcoidosis

Sarcoidosis showed the highest risk in obese women among all studied ADs but the association was not compatible with a linear trend. Heterogeneity between BMI and risk of sarcoidosis was observed across BMI categories ( $P_{\text{homogeneity}} < 0.01$ ) with an increased risk in overweight (HR 1.90; 95% CI, 1.27 to 2.84) and obese (HR 3.59; 95% CI, 2.31 to 5.57) women. Restricted diagnosis analysis (Table 3) showed a more than 2-fold increased risk of sarcoidosis in overweight (HR 2.26; 95% CI, 1.35 to 3.79) women and a more than 4-fold increased risk in obese women (HR 4.30; 95% CI, 2.47 to 7.50) ( $P_{\text{homogeneity}} < 0.01$ ).

### Type 1 diabetes mellitus

The risk of T1DM increased by 7% (4–11%) per BMI unit increase ( $P_{\text{trend}} < 0.01$ ). Accordingly, a 2.7-fold increased risk was found in obese women (HR 2.67; 95% CI, 1.71 to 4.17) (Table 3). In restricted diagnosis analyses, the

association between BMI and T1DM remained with a 2-fold increased risk of T1DM among obese women (HR 2.01; 95% CI, 1.15 to 3.51). Adjusting for GWG showed no association in obese women (HR 1.66, 95% CI 0.96–2.85) and no linear trend was observed ( $P_{\text{trend}} = 0.12$ ). Adjusting for PPWR did not change estimates (Appendix Table 4, available as Supplementary data at *IJE* online).

### Other frequent ADs

Risks of other frequent ADs, including ankylosing spondylitis, Graves' disease, Hashimoto's thyroiditis, ulcerative colitis, erythema nodosum, and multiple sclerosis were not associated with BMI.

## Discussion

This large population-based cohort study of 75 008 Danish women suggests an association between BMI and development of several autoimmune diseases. Associations were found between increasing BMI and ADs in overall analyses for 'any AD', dermatitis herpetiformis and especially T1DM and sarcoidosis. Despite no overall trends, we also found a higher risk of psoriasis and rheumatoid arthritis in obese women. In restricted analyses, a U-shaped pattern between BMI and Crohn's disease was observed. Inverse associations between BMI and celiac disease and Raynaud's phenomenon were seen.

The primary strength of this study was the assessment of a well-characterized large cohort of women followed prospectively for more than a decade after collection of height and weight data and with detailed information on potentially important confounders and mediators such as smoking, alcohol, gestational weight gain and postpartum weight retention. Another advantage was the ability to exclude prevalent AD cases at baseline with high completeness due to access to both self-reported and register-based information. Additionally, we had access to information on BMI prior to diagnosis of ADs, hence avoiding recall bias. The use of interview data from DNBC combined with register information made it possible to investigate an exposure such as BMI, usually not accessible in registers, and outcomes covering 43 different ADs.

Nevertheless, the study also has limitations to consider. Diagnoses of ADs were extracted from a hospital register containing information on diagnoses from all Danish inpatient and outpatient settings. However, milder cases of some of the ADs are likely to be diagnosed and treated by general practitioners or specialists, which is why our findings may apply mainly to the more severe cases of AD. Onset of disease might have occurred sometime before hospital contact, but this is not likely to have influenced results markedly, as women were followed for more than



11 years and the median (lower-upper quartile) time from start of follow-up to diagnosis of an AD was 5.8 (2.9–8.6) years. Incidence of some autoimmune diseases such as thyroiditis, Sjögren's disease and rheumatoid arthritis peak after age 50 years and a long follow-up period would be preferable, but most autoimmune diseases can be diagnosed at any age and many in the reproductive years.<sup>3</sup> Concerning validity of the Danish National Patient Register, the register includes information on all somatic hospital admissions since 1977, with inclusion of outpatients and emergency patients in 1995.<sup>33</sup> For several of the ADs in question, e.g. T1DM, ulcerative colitis (UC), CD, MS and RA, the register has been validated.<sup>34–37</sup> To further evaluate validity of the studied ADs, we performed sensitivity analyses with cases recorded at least twice with the same diagnosis. This had little impact on results, adding robustness to the results. Women of low socio-occupational status could be a source of selection bias as this group has previously been found underrepresented in the DNBC.<sup>38</sup> Also, cohort members of the DNBC have in a previous study been found somewhat healthier in terms of weight and smoking than the general population. However, odds ratios of three different associations, including BMI and risk of stillbirth, were not biased by non-participation in the DNBC.<sup>39</sup> This in combination with an assumed low rate of women dropping out from the DNBC due to symptoms of a yet undiagnosed AD, indicates that selection bias is unlikely to have influenced findings markedly. Another consideration in relation to selection bias worth mentioning is infertility. Studies suggest that clinical (and thereby possibly also subclinical) AD<sup>40</sup> and to a greater extent high/low BMI<sup>41</sup> are associated with infertility (i.e. less likely to be included in the DNBC). Potentially, this may create selection bias; however, as the association between subclinical AD (which is the focus variable in this context since women with diagnosed AD before start of follow-up were excluded from analyses of that specific AD) and infertility is still considered inconsistent, we consider a possible selection bias due to the exclusion of infertile women negligible and if anything only likely to underestimate our results. BMI was only measured at start of follow-up, but a recent study found that weight increased equally for all BMI categories in women from early adulthood throughout the following 18 years of life.<sup>42</sup> Further, adjustments for weight changes linked to pregnancy, as represented by GWG and PPWR, were performed and the only noticeable observed effect was for GWG in the association between BMI and T1DM. Correction for multiple testing was not applied in this study since we assessed hypotheses for specific autoimmune diseases, not only an overall association between BMI and 'any' autoimmune disease.

### Sarcoidosis

Of all the ADs, the highest risk (more than 3-fold) in obese women was observed for sarcoidosis, a disease that, to our knowledge, has not previously been related to obesity besides increased BMI in patients with existing sarcoidosis.<sup>43</sup> The aetiology of sarcoidosis remains unknown but the disease involves immunological changes similar to those seen in obesity, including TNF- $\alpha$  production.<sup>44,45</sup> Infectious agents, such as mycobacteria, have been suspected as cause of sarcoidosis but, more possibly, disease development may depend on a combination of genetic polymorphisms, the triggering antigen itself and immune system status<sup>46</sup> in which the changed immunology caused by obesity could play a role. Besides, hypothalamic-pituitary locations of sarcoidosis are rare,<sup>47</sup> which is why it seems unlikely that the association is explained by an effect on the satiety centre in the hypothalamus that could lead to overnutrition and thereby obesity.

### Type 1 diabetes mellitus

To our knowledge, the >2-fold increased risk of T1DM in obese adults (women) represents a novel finding, though misclassification between type 1 and type 2 diabetes mellitus should be considered. Most studies of obesity and T1DM development have been performed in children and adolescents already diagnosed with T1DM, in whom the prevalence of overweight and obesity at time of diagnosis is increasing despite the fact that weight loss often precedes T1DM diagnosis.<sup>19,20</sup> The earliest disease mechanisms in T1DM are suggested to take place early in life,<sup>48</sup> perhaps even *in utero* because of maternal obesity-related immunological changes. Obesity is often passed on between generations and therefore it could be hypothesized that obesity in adult life and T1DM are linked, even though the disease was triggered already *in utero* due to maternal obesity. This theory is compatible with the observation that GWG seemed to be a mediator in the observed association.

### Psoriasis

Although no overall linear increase per BMI unit was observed, we found a >2-fold increased risk of psoriasis in obese women when compared with normal-weight women. The lack of significance could be due to lack of power in the very obese group. Further, the trend was significant in the restricted diagnosis analysis with a >3-fold increased risk of psoriasis in obese women. Contrary to T1DM, a possible relationship between obesity and psoriasis has been more thoroughly investigated, e.g. high BMI in adolescent girls has been connected to later psoriasis hospitalization,<sup>49</sup> but often studied in patients with existing disease.<sup>50</sup> A previous prospective study within the Nurses' Health Study II including 78 626 women followed for a

14-year period also found an association of similar strength between BMI and psoriasis.<sup>51</sup> The Nurses' Health Study was, however, based solely on self-reported psoriasis, whereas in the present study diagnoses were based on hospital diagnoses with exclusion of self-reported and register-based cases before start of follow-up, thereby strengthening the validity. Nevertheless, the two similar findings point to an association between obesity and development of psoriasis as has been observed in obese adolescents as well. At the molecular level, leptin and other adipokines have been suggested to be involved in the pathogenesis of psoriasis in overweight individuals<sup>52</sup> and further, leptin might serve as a marker of severity and chronicity in psoriasis.<sup>53</sup>

#### Rheumatoid arthritis

In our study, we found only a weak association between BMI and RA though obese women had a 1.5 increased risk of RA development compared with normal-weight women. A recent review emphasized that the association between leptin/high BMI and RA is still questionable,<sup>11</sup> and the increased risk found in some case-control studies<sup>13,14</sup> may reflect an increased risk of RA following obesity but possibly only valid in a subgroup of RA patients without auto-antibodies against cyclic citrullinated peptides;<sup>54,55</sup> subgroups not possible to identify in our study.

#### Celiac disease and dermatitis herpetiformis

Interestingly, we found an increased risk of celiac disease in underweight women. This observation points towards reverse causation; however, evidence of overweight/obesity in patients at time of diagnosis of celiac disease is evolving.<sup>25,26,56,57</sup> Against this, undiagnosed celiac disease or celiac disease diagnosed outside hospital settings might have caused underweight before registration of the celiac disease diagnosis in the Danish National Patient Register. Furthermore, dermatitis herpetiformis, which is closely associated with gluten sensitivity as in celiac disease,<sup>58</sup> showed the highest risk with increasing BMI (14% per BMI unit) among all investigated ADs. To our knowledge, the only previous study on BMI and dermatitis herpetiformis showed a linearly higher prevalence of this disease with increasing BMI among patients with untreated celiac disease, thereby supporting our results.<sup>59</sup>

#### Crohn's disease

We found an increased risk of CD in underweight women compared with normal weight, and an increased risk among obese women. In a recently published study by Chan and colleagues on BMI and development of IBD, the underweight category was not investigated.<sup>21</sup> Whether our results reflect an actual increased risk in underweight

women and not reverse causation due to early disease-induced weight loss is unclear. In support of our findings, a U-shaped relationship of BMI and risk of CD was previously found in a retrospective study by Mendall and colleagues<sup>22</sup> who suggested that this might be caused by underweight women having a more severe subtype and obese a less severe subtype of CD. Further, Chan and colleagues found no associations between high BMI and later development of UC or CD.<sup>21</sup> This is in line with our results for UC but, in restricted diagnosis analysis of CD, we found a 1.9 increased risk of CD in obese women. Chan and colleagues mainly investigated late-onset IBD with a median age at recruitment between 50 and 53 years, which may represent IBD of a different pathogenesis compared with IBD diagnosed earlier in life as in our study. Moreover, the study did not adjust for gender or age, even though BMI has been found both gender- and age-dependent when used as an indicator of body composition.<sup>60</sup> Alternatively, a possible role of the gut microbiome underlying the risk between BMI and CD should be considered, as the intestinal bacterial flora has been associated with obesity<sup>61</sup> and IBD in individuals with a genetic predisposition.<sup>62</sup> Our data do not permit a more detailed evaluation of this possibility.

#### Raynaud's phenomenon

Our finding of a decreased risk of Raynaud's phenomenon with increasing BMI remains unexplained and has, to our knowledge, not previously been reported.

#### Multiple sclerosis and thyroid autoimmunity

Lastly, and against expectations, MS was not found to be associated with BMI. Two former studies have shown an increased risk of MS in individuals who were obese in childhood<sup>63</sup> and adolescence,<sup>23,24</sup> whereas no association with BMI at time of disease occurrence has been observed,<sup>23</sup> hence suggesting adolescence to be critical in determining risk of MS. Likewise, thyroid autoimmunity was not found to be associated with BMI though a connection with leptin and obesity has been suggested.<sup>16</sup>

#### Shared mechanisms?

Overall, the suggested association between BMI and development of ADs in this study could be linked to the finding that several ADs such as psoriasis, IBD, RA, T1DM and MS have been related to changes in adipokine and cytokine levels which are seen in obesity as well.<sup>10,11,53</sup> Except for MS and UC, this corresponds to our findings. Co-occurrence of several ADs has been suggested, including RA, autoimmune thyroiditis and T1DM,<sup>64</sup> hence supporting a common aetiology or shared risk factors. On the other hand, the study

found an inverse association between RA and MS. Genetically this is supported by a study suggesting a shared risk allele between T1DM, RA and thyroiditis, but not MS.<sup>65</sup> To our knowledge, a shared genetic link between obesity and autoimmune diseases has not been investigated. Further, the modest effect of BMI on risk of 'any AD' may reflect that ADs comprise a too heterogeneous group of diseases to share BMI as a common aetiological factor. At the cellular level, the proliferation of regulatory T cells, which are known to dampen autoreactive responses under normal conditions, is suggested to be inversely correlated with leptin in early stages of autoimmune disease, and obesity has even been proposed to be an autoimmune disorder in itself.<sup>11,66</sup> Additionally, recent research suggests Th17 cell expansion to be a prominent element of pro-inflammatory diseases in obesity<sup>67</sup> and has been found to be connected to autoimmune diseases such as RA, ankylosing spondylitis, SLE, MS, psoriasis and IBD.<sup>68</sup> Possibly, the unstable Th17 cells are converted into either Th1 or Th2 phenotype, causing Th1- or Th2-mediated autoimmune diseases.<sup>68</sup> Another hypothesis could be the fact that leptin levels have been found 2- to 3-fold higher in women compared with men due to a higher percentage of body fat in females at a given weight or BMI.<sup>69</sup> Along with a predominance of ADs in women,<sup>70</sup> this adds to the possible relationship between obesity and AD development.

In conclusion, this cohort study of young Danish women showed an increased risk of some but not all ADs in obese women, most notably for sarcoidosis and T1DM. These novel results are interesting in light of the rising prevalence of obesity and some ADs and may reflect obesity-related complex immunological changes leading to autoimmune reactions. Underlying mechanisms and observed associations need further investigation.

## Supplementary Data

Supplementary data are available at *IJE* online.

## Funding

This work was supported by a Female Research Leader grant [grant number 09-066323] from the Danish Council of Independent Research to T.J. and from Familien Hede Niensens Foundation [grant number 9688-8883]. The funding sources had no role in the project.

**Conflict of interest:** None declared.

## References

1. Flegal KM, Kit BK, Orpana H, Graubard BI. Association of all-cause mortality with overweight and obesity using standard body mass index categories: a systematic review and meta-analysis. *JAMA* 2013;309:71.
2. Thomas SL, Griffiths C, Smeeth L, Rooney C, Hall AJ. Burden of mortality associated with autoimmune diseases among females in the United Kingdom. *Am J Public Health* 2010;100:2279.
3. Cooper GS, Stroehla BC. The epidemiology of autoimmune diseases. *Autoimmun Rev* 2003;2:119.
4. Bendixen H, Holst C, Sorensen TI, Raben A, Bartels EM, Astrup A. Major increase in prevalence of overweight and obesity between 1987 and 2001 among Danish adults. *Obes Res* 2004;12:1464.
5. Ogden CL, Yanovski SZ, Carroll MD, Flegal KM. The epidemiology of obesity. *Gastroenterology* 2007;132:2087.
6. Stevens GA, Singh GM, Lu Y *et al.* National, regional, and global trends in adult overweight and obesity prevalences. *Popul Health Metr* 2012;10:22.
7. Ogden CL, Carroll MD, Kit BK, Flegal KM. Prevalence of obesity among adults: United States, 2011-2012. *NCHS Data Brief* 2013;131:1-8.
8. Das UN. Is obesity an inflammatory condition? *Nutrition* 2001;17:953.
9. Carbone F, La RC, Matarese G. Immunological functions of leptin and adiponectin. *Biochimie* 2012;94:2082.
10. Procaccini C, Jirillo E, Matarese G. Leptin as an immunomodulator. *Mol Aspects Med* 2012;33:35.
11. Stofkova A. Leptin and adiponectin: from energy and metabolic dysbalance to inflammation and autoimmunity. *Endocr Regul* 2009;43:157.
12. Matarese G, Leiter EH, La CA. Leptin in autoimmunity: many questions, some answers. *Tissue Antigens* 2007;70:87.
13. Symmons DP, Bankhead CR, Harrison BJ *et al.* Blood transfusion, smoking, and obesity as risk factors for the development of rheumatoid arthritis: results from a primary care-based incident case-control study in Norfolk, England. *Arthritis Rheum* 1997;40:1955.
14. Voigt LF, Koepsell TD, Nelson JL, Dugowson CE, Daling JR. Smoking, obesity, alcohol consumption, and the risk of rheumatoid arthritis. *Epidemiology* 1994;5:525.
15. Stavropoulos-Kalinoglou A, Metsios GS, Koutedakis Y, Kitas GD. Obesity in rheumatoid arthritis. *Rheumatology (Oxford)* 2011; 50:450.
16. Duntas LH, Biondi BM. The interconnections between obesity, thyroid function, and autoimmunity: the multifold role of leptin. *Thyroid* 2013;23:646-53.
17. Armstrong AW, Harskamp CT, Armstrong EJ. The association between psoriasis and obesity: a systematic review and meta-analysis of observational studies. *Nutr Diabetes* 2012;2:e54.
18. Sterry W, Strober BE, Menter A. Obesity in psoriasis: the metabolic, clinical and therapeutic implications. Report of an interdisciplinary conference and review. *Br J Dermatol* 2007;157:649.
19. Kaminski BM, Klingensmith GJ, Beck RW *et al.* Body mass index at the time of diagnosis of autoimmune type 1 diabetes in children. *J Pediatr* 2012;162:736.
20. Liu LL, Lawrence JM, Davis C *et al.* Prevalence of overweight and obesity in youth with diabetes in USA: the SEARCH for Diabetes in Youth study. *Pediatr Diabetes* 2010;11:4.
21. Chan SS, Luben R, Olsen A *et al.* Body mass index and the risk for Crohn's disease and ulcerative colitis: data from a European

- prospective cohort study (the IBD in EPIC Study). *Am J Gastroenterol* 2013;108:575.
22. Mendall MA, Gunasekera AV, John BJ, Kumar D. Is obesity a risk factor for Crohn's disease? *Dig Dis Sci* 2011;56:837.
  23. Hedstrom AK, Olsson T, Alfredsson L. High body mass index before age 20 is associated with increased risk for multiple sclerosis in both men and women. *Mult Scler* 2012;18:1334.
  24. Munger KL, Chitnis T, Ascherio A. Body size and risk of MS in two cohorts of US women. *Neurology* 2009;73:1543.
  25. Dickey W, Kearney N. Overweight in celiac disease: prevalence, clinical characteristics, and effect of a gluten-free diet. *Am J Gastroenterol* 2006;101:2356.
  26. Tucker E, Rostami K, Prabhakaran S, Al DD. Patients with coeliac disease are increasingly overweight or obese on presentation. *J Gastrointest Liver Dis* 2012;21:11.
  27. Katz P, Gregorich S, Yazdany J *et al*. Obesity and its measurement in a community-based sample of women with systemic lupus erythematosus. *Arthritis Care Res (Hoboken)* 2011;63:261.
  28. Olsen J, Melbye M, Olsen SF *et al*. The Danish National Birth Cohort – its background, structure and aim. *Scand J Public Health* 2001;29:300.
  29. World Health Organization. *Obesity: Preventing and Managing the Global Epidemic*. Geneva, Switzerland: World Health Organization, 2000.
  30. Diamond B, Lipsky PE. Autoimmunity and autoimmune diseases. In: Longo DL, Fauci AS, Kasper DL *et al* (eds). *Harrison's Principles of Internal Medicine*. 18th edn. New York: McGraw-Hill, 2011.
  31. Haynes BD, Fauci AS. Introduction to the immune system. In: Fauci AS, Braunwald E, Isselbacher KH *et al* (eds). *Harrison's Principles of Internal Medicine*. 14th edn. New York: McGraw-Hill, 1998.
  32. Lin D, Wei L, Ying Z. Checking the Cox model with cumulative sums of martingale-based residuals. *Biometrika* 1993;80:557.
  33. Andersen TF, Madsen M, Jorgensen J, Mellemkjoer L, Olsen JH. The Danish National Hospital Register. A valuable source of data for modern health sciences. *Dan Med Bull* 1999;46:263.
  34. Fonager K, Sorensen HT, Rasmussen SN, Moller-Petersen J, Vyberg M. Assessment of the diagnoses of Crohn's disease and ulcerative colitis in a Danish hospital information system. *Scand J Gastroenterol* 1996;31:154.
  35. Mason K, Thygesen LC, Stenager E, Bronnum-Hansen H, Koch-Henriksen N. Evaluating the use and limitations of the Danish National Patient Register in register-based research using an example of multiple sclerosis. *Acta Neurol Scand* 2012;125:213.
  36. Nielsen GL, Sorensen HT, Pedersen AB, Sabroe S. Analyses of data quality in registries concerning diabetes mellitus – a comparison between a population based hospital discharge and an insulin prescription registry. *J Med Syst* 1996;20:1.
  37. Pedersen M, Klarlund M, Jacobsen S, Svendsen AJ, Frisch M. Validity of rheumatoid arthritis diagnoses in the Danish National Patient Registry. *Eur J Epidemiol* 2004;19:1097.
  38. Jacobsen TN, Nohr EA, Frydenberg M. Selection by socioeconomic factors into the Danish National Birth Cohort. *Eur J Epidemiol* 2010;25:349.
  39. Nohr EA, Frydenberg M, Henriksen TB, Olsen J. Does low participation in cohort studies induce bias? *Epidemiology* 2006;17:413.
  40. Sen A, Kushnir VA, Barad DH, Gleicher N. Endocrine autoimmune diseases and female infertility. *Nat Rev Endocrinol* 2014;10:37–50.
  41. Davies MJ. Evidence for effects of weight on reproduction in women. *Reprod Biomed Online* 2006;12:552.
  42. Malhotra R, Ostbye T, Riley CM, Finkelstein E. Young adult weight trajectories through midlife by body mass category. *Obesity (Silver Spring)* 2013;21:1923–34.
  43. Gvozdenovic BS, Mihailovic-Vucinic V, Vukovic M *et al*. Effect of obesity on patient-reported outcomes in sarcoidosis. *Int J Tuberc Lung Dis* 2013;17:559.
  44. Iannuzzi MC, Rybicki BA, Teirstein AS. Sarcoidosis. *N Engl J Med* 2007;357:2153.
  45. Iannuzzi MC, Fontana JR. Sarcoidosis: clinical presentation, immunopathogenesis, and therapeutics. *JAMA* 2011;305:391.
  46. Culver DA. Sarcoidosis. *Immunol Allergy Clin North Am* 2012;32:487.
  47. Bihan H, Guillot H, Fysekidis M *et al*. Sarcoidosis: the involvement of anterior pituitary hormones is poorly recognized. *Presse Med* 2012;41:e524–29.
  48. Pugliese A. The multiple origins of Type 1 diabetes. *Diabet Med* 2012;30:135.
  49. Bryld LE, Sorensen TI, Andersen KK, Jemec GB, Baker JL. High body mass index in adolescent girls precedes psoriasis hospitalization. *Acta Derm Venereol* 2010;90:488.
  50. Naldi L, Chatenoud L, Linder D *et al*. Cigarette smoking, body mass index, and stressful life events as risk factors for psoriasis: results from an Italian case-control study. *J Invest Dermatol* 2005;125:61.
  51. Setty AR, Curhan G, Choi HK. Obesity, waist circumference, weight change, and the risk of psoriasis in women: Nurses' Health Study II. *Arch Intern Med* 2007;167:1670.
  52. Johnston A, Arnadottir S, Gudjonsson JE *et al*. Obesity in psoriasis: leptin and resistin as mediators of cutaneous inflammation. *Br J Dermatol* 2008;159:342.
  53. Gerdes S, Rostami-Yazdi M, Mrowietz U. Adipokines and psoriasis. *Exp Dermatol* 2011;20:81.
  54. Pedersen M, Jacobsen S, Klarlund M *et al*. Environmental risk factors differ between rheumatoid arthritis with and without auto-antibodies against cyclic citrullinated peptides. *Arthritis Res Ther* 2006;8:R133.
  55. Wesley A, Bengtsson C, Elkan AC, Klareskog L, Alfredsson L, Wedren S. Association between overweight, obesity, ACPA positive and ACPA negative rheumatoid arthritis – results from the EIRA case-control study. *Arthritis Care Res (Hoboken)* 2012;61:107.
  56. Cheng J, Brar PS, Lee AR, Green PH. Body mass index in celiac disease: beneficial effect of a gluten-free diet. *J Clin Gastroenterol* 2010;44:267.
  57. Ukkola A, Maki M, Kurppa K *et al*. Changes in body mass index on a gluten-free diet in coeliac disease: a nationwide study. *Eur J Intern Med* 2012;23:384.
  58. Nakajima K. Recent advances in dermatitis herpetiformis. *Clin Dev Immunol* 2012;2012:914162.

59. Zingone F, Bucci C, Tortora R *et al.* Body mass index and prevalence of skin diseases in adults with untreated coeliac disease. *Digestion* 2009;**80**:18.
60. Gallagher D, Visser M, Sepulveda D, Pierson RN, Harris T, Heymsfield SB. How useful is body mass index for comparison of body fatness across age, sex, and ethnic groups? *Am J Epidemiol* 1996;**143**:228.
61. Sweeney TE, Morton JM. The human gut microbiome: a review of the effect of obesity and surgically induced weight loss. *JAMA Surg* 2013;**148**:563.
62. Knights D, Lassen KG, Xavier RJ. Advances in inflammatory bowel disease pathogenesis: linking host genetics and the microbiome. *Gut* 2013;**62**:1505.
63. Munger KL, Bentzen J, Laursen B *et al.* Childhood body mass index and multiple sclerosis risk: a long-term cohort study. *Mult Scler* 2013;**19**:1323–29.
64. Somers EC, Thomas SL, Smeeth L, Hall AJ. Are individuals with an autoimmune disease at higher risk of a second autoimmune disorder? *Am J Epidemiol* 2009;**169**:749.
65. Criswell LA, Pfeiffer KA, Lum RF *et al.* Analysis of families in the multiple autoimmune disease genetics consortium (MADGC) collection: the PTPN22 620W allele associates with multiple autoimmune phenotypes. *Am J Hum Genet* 2005;**76**:561.
66. Matarese G, Procaccini C, De RV, Horvath TL, La CA. Regulatory T cells in obesity: the leptin connection. *Trends Mol Med* 2010;**16**:247.
67. Winer S, Paltser G, Chan Y *et al.* Obesity predisposes to Th17 bias. *Eur J Immunol* 2009;**39**:2629.
68. Maddur MS, Miossec P, Kaveri SV, Bayry J. Th17 cells: biology, pathogenesis of autoimmune and inflammatory diseases, and therapeutic strategies. *Am J Pathol* 2012;**181**:8.
69. Rosenbaum M, Leibel RL. Clinical review 107: Role of gonadal steroids in the sexual dimorphisms in body composition and circulating concentrations of leptin. *J Clin Endocrinol Metab* 1999;**84**:1784.
70. Whitacre CC. Sex differences in autoimmune disease. *Nat Immunol* 2001;**2**:777.
